1 **Eyespots originated multiple times independently across the Lepidoptera**

2 Brian Hanotte<sup>1,\*</sup>, Beatriz Willink<sup>1,2</sup>, and Antónia Monteiro<sup>1,\*</sup>

3 1) Department of Biological Sciences, National University of Singapore, Singapore

4 2) Department of Zoology, Stockholm University, Sweden

5 \*Corresponding authors

6 **Abstract**

7 Eyespot color patterns often function as a defense against predators and in mate choice. In  
8 Nymphalid butterflies, eyespots have a single evolutionary origin close to the base of this clade, but  
9 eyespots are also present in many other lepidopteran lineages and may have multiple independent  
10 origins. Here we use phylogenetic comparative methods to investigate the evolution of eyespots  
11 across a multi-superfamily phylogeny of Lepidoptera, and to pinpoint lineages in which eyespots  
12 likely originated independently. We find a total of 28 separate origins of *Discal* eyespots (in the discal  
13 wing region) and 19 separate origins of *Marginal* eyespots (in the marginal wing region), including  
14 four separate instances where eyespots were preserved in most extant representatives of a species  
15 radiation. The first two eyespot radiations we observed are in the Nymphalidae, with a *Marginal*  
16 eyespot radiation occurring before a *Discal* one. While the remaining two eyespot radiations were  
17 observed in the Saturniidae, occurring in a reverse fashion, where a *Discal* eyespot radiation  
18 preceded a *Marginal* eyespot radiation. Even though eyespots do not appear to be homologous  
19 across Lepidoptera they may share a homologous gene-regulatory network. Our phylogenetic  
20 inference provides a roadmap for future developmental and functional studies addressing this  
21 hypothesis. This study therefore has implications for our understanding of the evolution of serial  
22 homologues and of convergent evolution of visual signals in insects.

23 **Introduction**

24 Lepidopteran wing color patterns have been a source of fascination and human inspiration for  
25 centuries (Hogue, 1987). While some of the classic early research focused on the adaptive role of  
26 general wing coloration, such as “industrial melanism” in moths (Kettlewell, 1973), other research

27 focused on the role of localized color patterns, such as eyespots (Blest, 1957). Eyespots consist of  
28 more than one concentric ring of contrasting colored scales, often mimicking a vertebrate eye (Oliver  
29 et al., 2014; Labandera et al., 2016). These visually striking color patterns play roles in predator  
30 deterrence, predator deflection, and mate selection (Breuker & Brakefield 2002; Stevens, 2005;  
31 Robertson and Monteiro 2005; Vallin et al. 2007; Kodandaramaiah, 2011; Merilaita et al., 2011;  
32 Prudic et al. 2012; Kodandaramaiah et al., 2013; Prudic et al., 2015; Mukherjee & Kodandaramaiah,  
33 2015; Huq et al., 2019; Halali et al., 2019). Eyespots are thus adaptive, having evolved in several  
34 clades of Lepidoptera, but their evolutionary history remains poorly understood.

35 Research on eyespot evolution to date has focused on nymphalid butterflies. Here eyespots develop  
36 in between veins at the wing margins (Fig. 1a-b). Such *Marginal* eyespots evolved once in  
37 Nymphalidae, shortly after the origin of the clade (Oliver et al., 2012 & 2014), and are therefore  
38 considered homologous. Several moth lineages (e.g., Semanturidae, Saturniidae, Cambridae) also  
39 exhibit *Marginal* eyespots, but their evolutionary history has not been investigated. In contrast to  
40 *Marginal* eyespots, *Discal* eyespots are centered on cross veins or placed within the discal cell region  
41 (Otaki., 2020; Fig. 1c-d). Across Lepidoptera, species may have *Marginal* eyespots, *Discal* eyespots, or  
42 eyespots located on both wing regions (Fig. 2). Because these distinct wing regions express different  
43 genes during development (Banerjee et al., 2023), the evolution of *Marginal* and *Discal* eyespots  
44 might have occurred independently in each region (Fig. 1E). Alternatively, eyespots might have first  
45 evolved on one wing region, and later evolved on the other region, with the order of these regions  
46 potentially varying if there are multiple independent eyespot origins (Fig. 1e-g). By investigating the  
47 evolution of eyespots across the Lepidoptera we aim to discover whether *Marginal* and *Discal*  
48 eyespots are homologous or convergently evolved across the Lepidoptera.

49 Here we used modern phylogenetic methods to investigate the evolutionary origins of *Discal* and  
50 *Marginal* eyespot across Lepidoptera. We first inferred a species-level phylogeny for Lepidoptera,  
51 sampling up to 27 (5-24 fragments per species) molecular sequences in over 715 species. Our

52

53

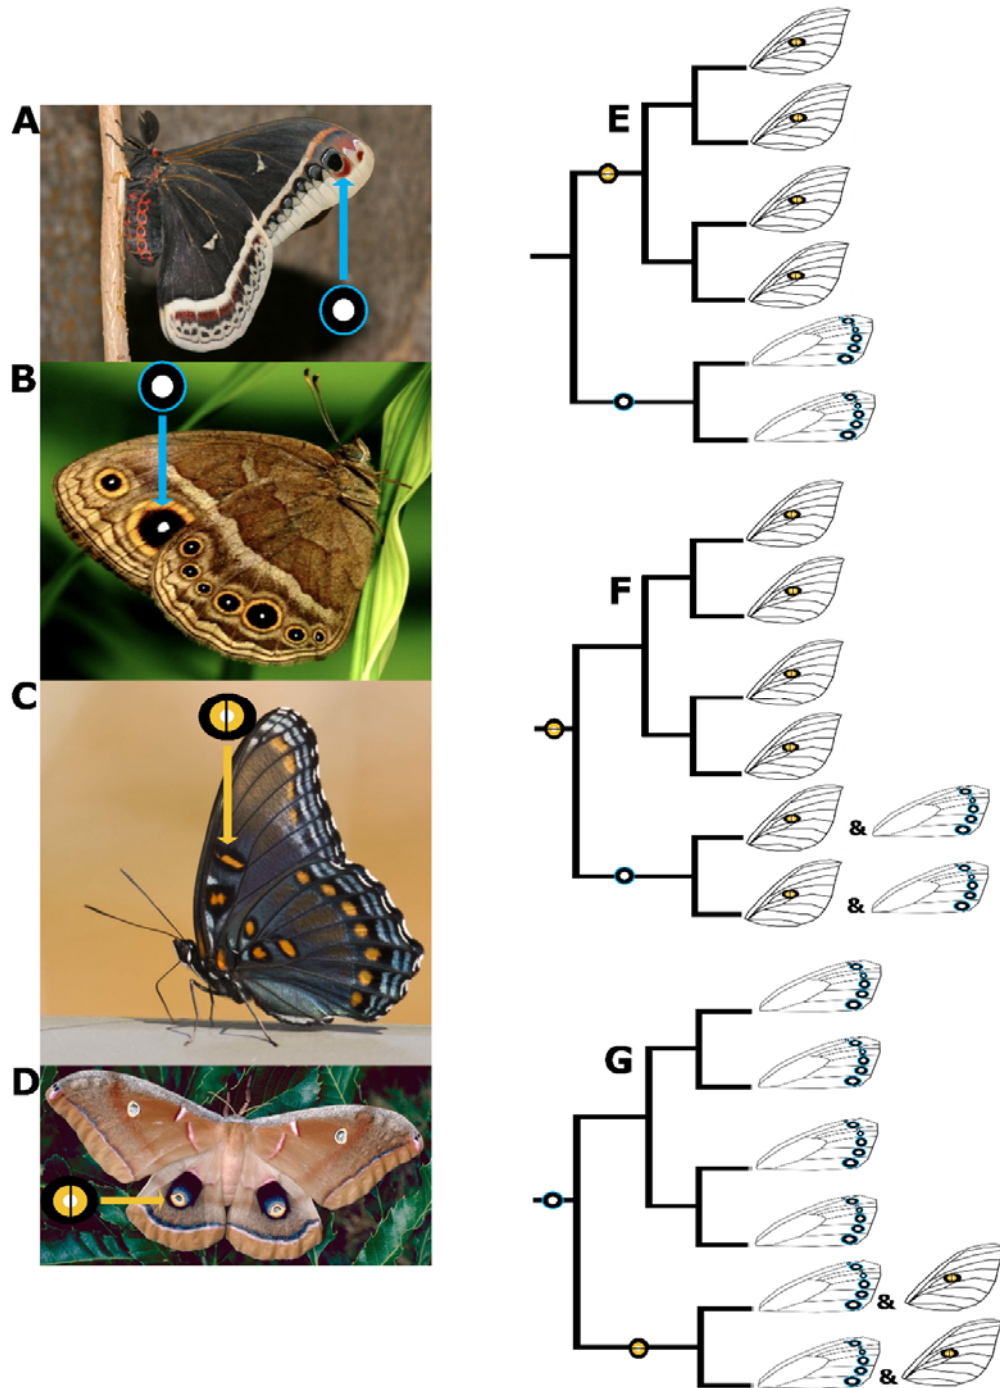

**Figure 1 A/B/C/D/E/F/G.** The regions of the wing for this study were partitioned into the following two zones, marginal and discal. marginal eyespots are eyespots found between butterfly wing veins, this is demonstrated by A & B as a real-world examples and E-G in our theoretical examples while discal eyespots are eyespots found in the anterior region of the wing (demonstrated by C, D and E-G respectively). Species: A = *Eupakardia calleta*, B = *Bicyclus anynana*, C = *Limenitis arthemis* & D = *Antheraea polyphemus*. Figure 1 E-G. Theoretical models of eyespot evolution taken into consideration by our model. In E it is theorised that Discal eyespots evolved first and marginal eyespots second. In F it is theorised that marginal eyespots evolved first, and discal eyespots evolved second. In G, it is theorised that marginal and discal eyespots evolve separately. It was decided that all three of these models is equally plausible with no prior assumptions made.

eyespot radiation. Colours in the key represent the corresponding super families in Figure 5.

54 phylogeny covers 90% of Lepidoptera families, allowing comparative inferences of eyespot evolution  
55 in moths and butterflies. We then modeled evolutionary origins and losses of eyespots and inferred  
56 ancestral states across the phylogeny. For each possible subtree with an ancestral eyespot origin, we  
57 implemented a model comparison approach, based on marginal likelihood estimation, to quantify  
58 support for eyespot homology among extant taxa. These analyses suggested differently ordered  
59 sequences of eyespot evolution in the two main eyes-spot bearing radiations, the silkmoths  
60 (Saturniidae) and the brush-footed butterflies (Nymphalidae). Our results demonstrate that eyespots  
61 in the Lepidoptera have evolved multiple times, and that *Discal* and *Marginal* eyespots have evolved  
62 in different temporal sequences in the main clades where they radiated (Nymphalidae and  
63 Saturniidae). We also find that eyespots have evolved in a further 10 superfamilies and numerous  
64 families across the Lepidopteran family tree. Finally, we find that eyespots across the lepidoptera are  
65 more commonly observed in the *Discal* region (28 occurrences) than the *Marginal* region (19  
66 occurrences) which was unexpected as most eyespot research is focused on *Marginal* eyespots  
67 found in the Nymphalidae.

## 68 **Materials and methods**

### 69 Molecular data collection for phylogenetic tree construction

70 DNA sequence data for 645 species of Lepidoptera (moths and butterflies) and seven species of  
71 Trichoptera (caddisflies, outgroup) were kindly provided by Professor Emeritus Charles Mitter  
72 (University of Maryland, Table S1 & S2). Additional sequences for 70 species of Saturniidae  
73 (silkmoths) were downloaded from NCBI (GenBank). The full dataset was composed of 27 protein-  
74 coding genes (Table S2), with 5-24 fragments available across all species. Our taxonomic sampling  
75 includes ~68% (90/133, Van Nieuwerkerken et al., 2011) of all families and ~65% (28/43, Van Nieuwerkerken  
76 et al., 2011) of all superfamilies in the order Lepidoptera. This study focuses on the suborder Ditrysia,  
77 which comprises ~98% of currently described lepidopterans. Of these, ~90% of families (90/100,  
78 Reiger et al., 2009) and ~93-96% (28/29-30) of superfamilies (Van Nieuwerkerken et al., 2011; Heikkla et

79 al., 2015; Mitter et al., 2017) are represented. We chose the Trichoptera for our outgroup because  
80 they are the closest extant relatives to the Lepidoptera (Mey et al., 2017), but distant enough to  
81 provide ingroup monophyly.

## 82 Sequence alignment and phylogenetic inference

83 DNA sequences were aligned via MAFFT v 7.4.90 (Katoh & Standley, 2013). A global alignment  
84 strategy with iterative refinement (G-INS-i) was employed to maximize alignment accuracy based on  
85 weighted sum-of-pairs and a consistency scores. The length of the final alignment, consisting of all 27  
86 concatenated gene fragments, was 22,643 bp.

87 IQ-TREE v 1.6.12 (Nguyen et al., 2015, Kalyaanamoorthy et al., 2017 & Hoang et al., 2018) was used  
88 for phylogenetic inference under maximum likelihood. All genes were subject to a single substitution  
89 process automatically set by IQ-TREE, using ModelFinder (Kalyaanamoorthy et al., 2017).

90 Substitutions followed a generalized time reversible (GTR) model, with estimated base frequencies.  
91 Rate variation among sites followed a gamma distribution containing 10 categories. Node support  
92 was estimated using ultra-fast bootstrap in UFBoot (Hoang et al., 2018) for 100,000 iterations.

93 UFBoot is an efficient approximation to the traditional bootstrap method that is particularly well-  
94 suited for large datasets such as ours. After pruning the outgroup, our maximum likelihood tree was  
95 transformed into an ultrametric tree, with branch lengths scaled to time, using the ape package v  
96 5.7-1 (Paradis & Schliep, 2019) in R v 4.3.0 (R Core Team 2023). For branch scaling, we used an age of  
97 ~290 Ma for the most recent common ancestor of Ditrysia, following the most recent dated  
98 phylogeny of Lepidoptera (Kawahara et al., 2019).

## 99 Image data collection

100 We scored images of each of the 715 species in our phylogeny for presence or absence of eyespot  
101 patterns (in any wing surface or sex). An eyespot pattern was identified as present only if it met three  
102 criteria: 1) it had at least two concentric rings of distinct colors, 2) the rings were circular or oblong in

103 shape, and 3) the color inside the internal ring differed from the color on the outside of both rings  
104 (Fig. 3). To explore the sensitivity of our results to these conservative criteria, we repeated our main  
105 comparative analyses under a more relaxed definition of eyespots, where criterion 2 was extended  
106 to non-circular/oblong shapes (e.g., triangles, rectangles, teardrops, see Fig. S1 for examples).  
107 Eyespots were further classified based on their locations on the wing surface. *Discal* eyespots  
108 straddle the cross veins in the discal cell region or are found within and around the discal cell (Otaki  
109 et al., 2020 & Figure 1), whereas *Marginal* eyespots are found in between longitudinal veins, at the  
110 wing margins and within the discal cell of the wing (Fig. 1a-d).

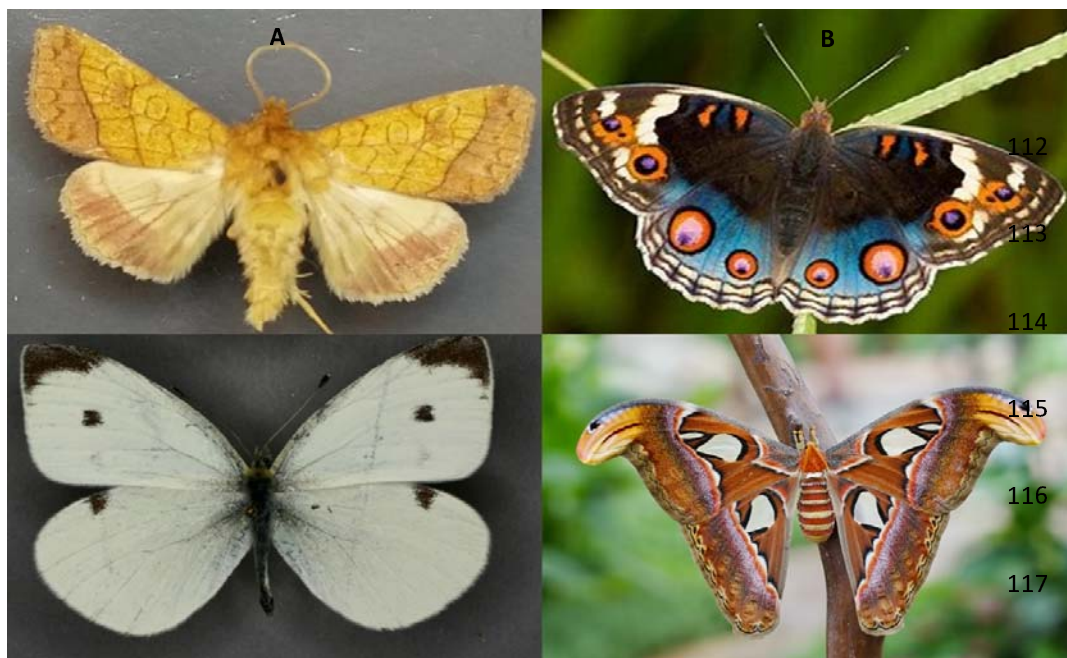

119 **Figure 3.** A visual guide demonstrating the difference between eyespots (A), a ring  
120 formation (B), spots (C) and an eyespot like pattern (D). Species: *Pyrrhia adela* (A), *Junonia*  
121 *almana* (B), *Pieris canidia* (C) and *Attacus atlas* (D).  
122

120 We first queried a wide range of online databases for images of the type specimen of each of the  
121 sampled species (Table S3, Supplementary data file 1). If not available, images of other (non-type)  
122 specimens were collected from the same databases with a preference for museum specimens over  
123 other specimens. In cases where sequence data was assigned to a particular subspecies, we  
124 prioritized images of the same taxonomic rank when available. Ninety-six species included in our  
125 data set lacked publicly available and reliably identified images. We photographed 81 of these

126 species at the McGuire Center for Lepidoptera (MGCL, Florida Museum of Natural History, 3215 Hull  
127 Rd, Gainesville, FL 32611), using a Canon D50 DSLR camera. We were unable to obtain images for 15  
128 species (2%), which are treated as missing data in all comparative analyses.

#### 129 Modelling the origin and loss of eyespots in Lepidoptera

130 RevBayes v 1.2.1 (Höhna et al., 2016) was used in this and subsequent analyses to model eyespot  
131 evolution across Lepidoptera. RevBayes is an open-source software package designed for Bayesian  
132 phylogenetic inference. It allows users to build probabilistic graphical models using an interactive  
133 model-specification language.

134 Eyespots were modelled as a discrete trait with two states (presence/absence) with unequal  
135 transition rates drawn from identical exponential priors. The rate parameters of these priors were set  
136 to reflect an expectation of 10 events (10 eyespot gains and 10 eyespot losses) along the tree. Root  
137 state frequencies were in turn drawn from a Dirichlet prior, assuming equal probability of presence  
138 or absence of eyespots at the origin. Eyespot evolution was modelled separately using three  
139 datasets: eyespot presence/absence irrespective of eyespot location on the wing, presence/absence  
140 of *Marginal* eyespots, and presence/absence of *Disca* eyespots. For all three datasets, eyespots  
141 could be located on any wing surface and either sex.

142 Each model was run for 100,000 iterations with an initial burn-in of 10,000, and tuning parameter  
143 proposals every 1,000 iterations on two independent chains. Joint conditional ancestral states were  
144 sampled every 100 iterations and plotted using RevGadgets v 1.1.1 (Tribble et al., 2023) in R. We  
145 evaluated the convergence and stationarity of the MCMC chains for each model using the R package  
146 Convenience v 1.0.0 (Fanreti et al., 2013)

#### 147 Testing eyespot homology in selected clades

148 We next implemented a model testing approach to investigate eyespot homology among extant  
149 species of Lepidoptera. We identified all subclades including three or more taxa bearing eyespots,

150 regardless of their location. If the most recent ancestor of these clades also displayed eyespots, it is  
151 likely that eyespots in extant taxa are homologous. To test this hypothesis, we extracted all subclades  
152 from the complete ultrametric phylogeny and applied in each case two alternative versions of the  
153 discrete-trait model described above. In the first version (hereafter the multiple-origin model), we  
154 set the root frequency of eyespot presence to zero, effectively constraining the common ancestor of  
155 the subclade to lack eyespots. In the second version (the common-ancestor model), we instead  
156 enforced a common ancestor with eyespots by setting the root frequency of eyespot presence to  
157 one. We then compared the marginal likelihood (ML) of these alternative models using log 10 of the  
158 raw Bayes factor using thresholds based on Jeffreys (1998). In our study, results above positive 0.1  
159 were considered to show some support for an eyespot originating at a specific node. Results above  
160 0.5 were considered to have strong support, results above 1.0 were considered to have very strong  
161 support and results which were positive numbers but below 0.1 were considered to demonstrate  
162 very weak support which wasn't worth mentioning. Finally negative results were considered to  
163 represent no support for an eyespot origin at a given node. These thresholds for the support of  
164 eyespots being present at a particular node were chosen due to the high number of negative values  
165 we obtained in our study (values above -1.0) which is indicative of a lack of support for a single origin  
166 of eyespots.

167 ML estimates gauge the fit of a model, including its priors, to the data, in this case, the phylogeny  
168 and presence or absence of eyespots in extant taxa. Because the two models being compared differ  
169 only in their prior assumptions about the character state at the root, their direct comparison serves  
170 as a statistical test of the support for eyespot presence in the most recent common ancestor of the  
171 clade. ML was estimated via the use of two sampling methods, steppingstone sampling (SS) and path  
172 sampling (PS, Lartillot and Philippe, 2006, Fan et al., 2011 & Xie et al., 2011). For both methods the  
173 power posterior analysis was split into 50 intervals between the prior and posterior and was run for  
174 5,000 iterations with a burn-in of 5,000 generations. We repeated ML approximations for each  
175 subclade and eyespot dataset and confirmed that both PS and SS estimates were stable (i.e. differing



176 by no more than 0.5 between independent runs of each set of power posteriors). The results of  
177 these analyses were summarized and plotted onto the phylogeny using the R packages phytools v1.9-  
178 16 (Revell, 2012), ggplot2 v3.4.3 (Wickham et al., 2016) and ggtree v3.9.0 (Yu et al., 2017 & 2018, Yu,  
179 2020 & 2022 & Xu et al., 2022), followed by the online tool ITOL (2023).

## 180 **Results**

### 181 Tree topology

182 The phylogeny constructed for this study contains 28 superfamilies, each containing 1 – 128 species  
183 in our samples (median = 14). The full list of superfamilies as well as the number of species  
184 representatives for each superfamily are outlined in Table S1 (Supplementary tables and figures). The  
185 topology of our tree is largely congruent with previous phylogenies (Heikkilä et al., 2015; Mitter et  
186 al., 2017; Kawahara et al., 2019). Topological differences observed between this study and previous  
187 ones involve species whose placement is phylogenetically uncertain (*incertae cedis*) or superfamilies  
188 previously shown to require reclassification (Tineoidea or the Cossioidea-Sesioidea complex for  
189 example; Mutanen et al., 2010; Bazinet et al., 2013; Reiger et al., 2013; Heikkilä et al., 2015 Reiger et  
190 al., 2015A; Mitter et al., 2017; Appendix 1). These differences in topology are unlikely to have a  
191 significant impact on the main findings of this work, as they primarily nested within large clades  
192 entirely lacking eyespots. A summary and discussion of novel species relationships identified in this  
193 work can be found in the Supplementary Information (Appendix 1).

### 194 Ancestral state reconstructions and evolutionary rates

195 Our three ancestral state reconstructions (*Both*, *Marginal* and *Discal*) indicate that the common  
196 ancestor, at the root of Lepidoptera did not have any eyespots (Fig. 4, Figs. S16 & S17). Eyespots thus  
197 evolved multiple times in the history of Lepidoptera (Figs. 4 & 5). Nonetheless, eyespots may often  
198 be evolutionarily short lived. Our results show a higher rate of eyespot losses than eyespot gains  
199 regardless of eyespot type. The *Both* eyespot model (Fig. 4), *Marginal* eyespot model and *discal*

200 eyespot model all showing a higher rate of eyespot losses than gains (Fig. 4 & Fig. S16 & S17). To  
201 explore the sensitivity of these results, we repeated all analyses under a more relaxed definition of  
202 eyespots, where we also included non-circular/oblong shapes as eyespots. These results were  
203 qualitatively similar to the results in our main analysis and are therefore presented in the  
204 supplementary tables and figures section (Fig. S18).

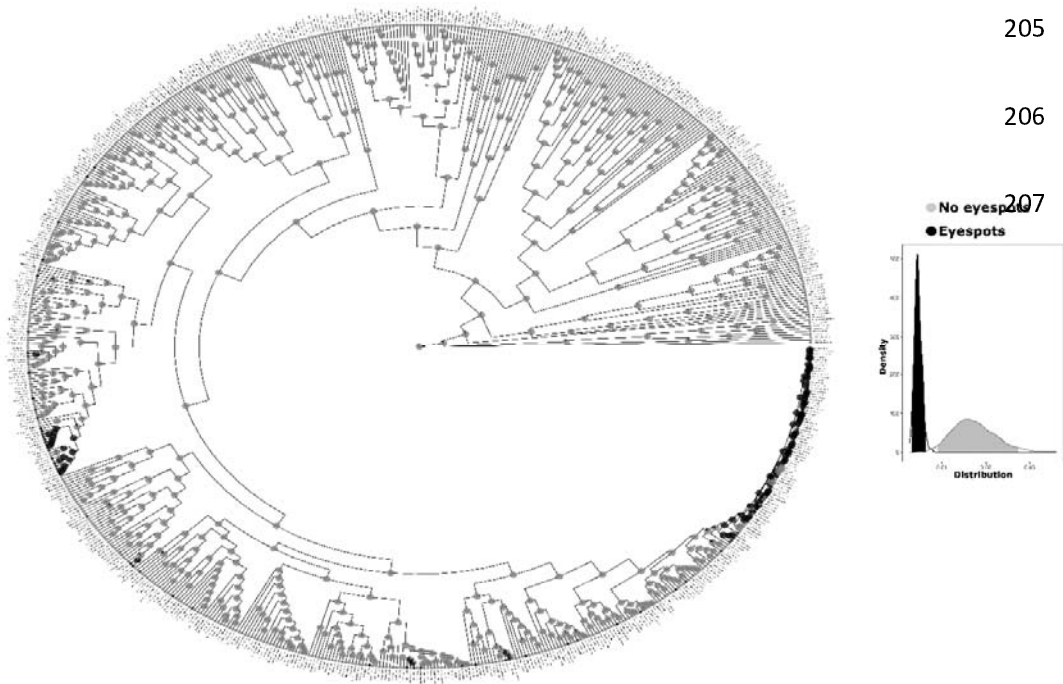

**Figure 4.** A) Phylogeny of the Lepidoptera with ancestral state reconstructions of what the ancestral state of each node represented by a Pi Chart. B) A smooth plot showing the density and distribution of each phenotype. When grouped together, *both* eyespot types in general appear to be found at high densities but with limited distribution across the phylogeny tree. Indicating eyespot radiations are present but not common throughout all sampled Lepidoptera. We can see from the smooth plot that the rates of gain and loss are not equal. With a higher loss than gain being observed for *both* eyespot types.

208 Our ancestral state reconstructions are consistent with 28 independent Discal eyespot gains, and 19

209 independent Marginal eyespot gains across 12 superfamilies of Lepidoptera represented in this tree  
 210 (Figs. 4, 5, S16 & S17). In contrast, we did not find any eyespots in specimens sampled from 16  
 211 superfamilies: Cimelioidea, Thyridoidea, Copromorphoidea, Hyblaeoidea, Sesiioidea, Gelechioidea,  
 212 Epermenioidea, Tortricoidea, Galacticoidea, Immoidea, Choreutoidea, Urodoidea, Pterophoroidea,

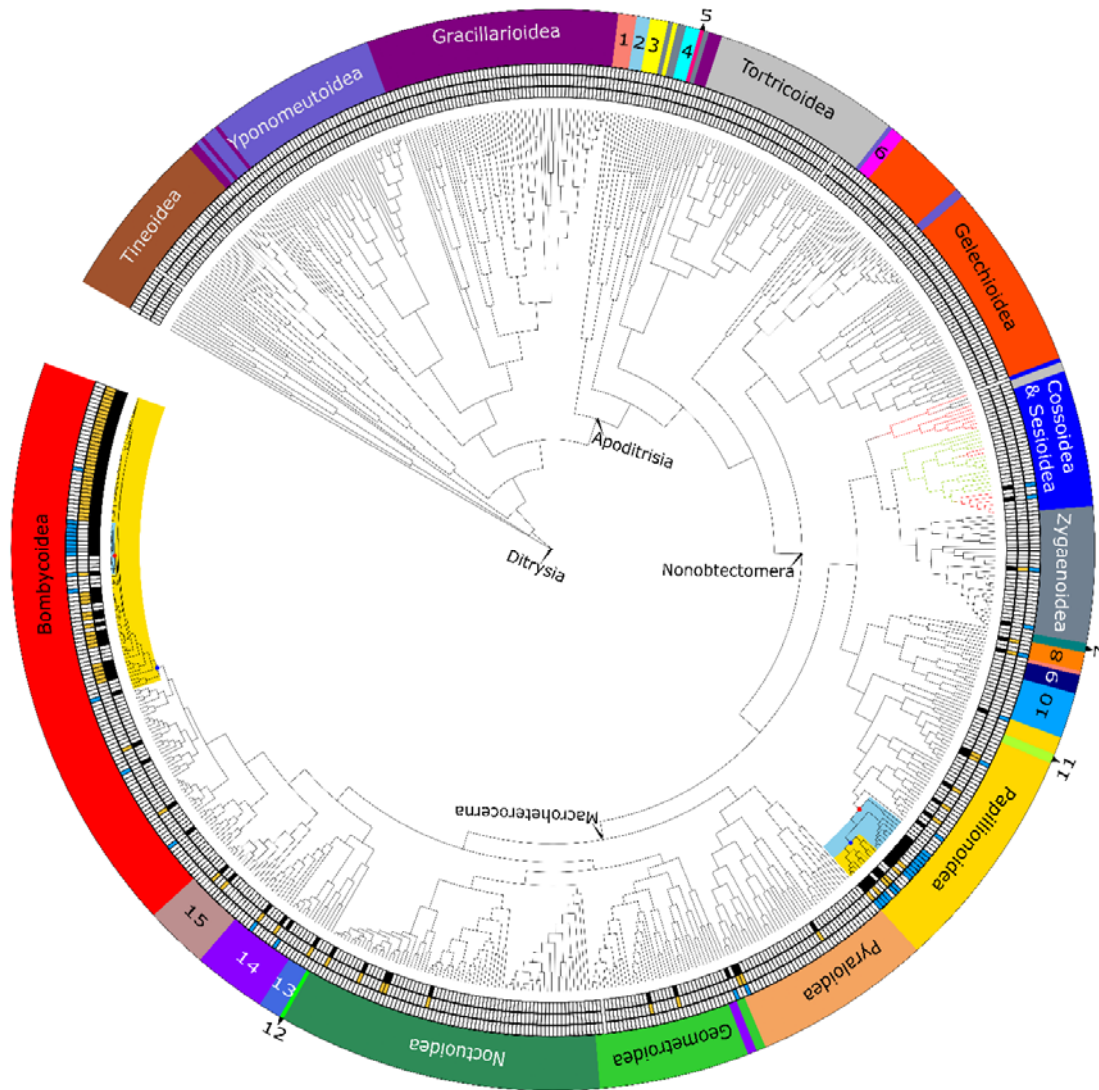

213 **Figure 5.** Phylogeny of the Lepidoptera comprising 715 species from 28 superfamilies. 12  
 214 superfamilies (Epermenioidea, Yponomeutoidea and Tineoidea) miss of the eyespot trait and the remaining 12  
 215 superfamilies which are too small to be written are numbered as the following 1 = Pterophoroidea, 2 = Urodoidea, 3 = Choreutoidea, 4 = Immoidea, 5 = Galacticoidea, 6 =  
 216 Epermenioidea, 7 = Hyblaeoidea, 8 = Calliduloidea, 9 = Copomorpoidea, 10 = Thyridoidea, 11 =  
 217 Hedylidae, 12 = Cimelioidea, 13 = Minnalloidea, 14 = Drepanoidea, 15 = Lasiaramphoidea.  
 Eyespot radiations are highlighted in blue (marginal) and yellow (discal). The presence/absence  
 eyespot presence in each individual species is marked by a yellow or blue square as well as a  
 black square indicating the presence or absence of the trait. The origin of the eyespot radiation  
 retained in the members of these families they originated (Fig. 5, Figs. S16 & S17). Yes  
 for the ancestral state reconstructions are available in Table 1.

218

219

220 Homology of eyespot radiations

221 To further investigate the ancestral nodes of independent eyespot origins, as suggested by our  
222 ancestral state reconstructions above, we contrasted the fit of a common-ancestor model vs a  
223 multiple-origin model, for the ancestor of each putative eyespot radiation. Our results using the  
224 combined eyespot data (i.e. all eyespots regardless of location), supported our earlier findings of  
225 eyespot bearing ancestors in Nymphalidae and Saturniidae (Table 1). By contrasting the results of  
226 analyses on the *Marginal* data and the *Discal* data, we inferred which eyespot location likely evolved  
227 first in each radiation (Fig. 1e-g). We were surprised to find that the area of the wing where eyespots  
228 first appeared was reversed between these two main clades. In nymphalids, the first eyespots  
229 appeared along the margin and were followed by *Discal* eyespots (Figs. 5, S10 & S15). The opposite  
230 was observed in saturniids, where *Discal* eyespots originated first followed by *Marginal* eyespots  
231 (Fig. 5, Figs. S10 & S15). *Discal* eyespots likely originated in the most recent common ancestor of all  
232 saturniids, while *Marginal* eyespots evolved within the Attacini tribe of the subfamily Saturniinae. In  
233 nymphalids, *Marginal* eyespots first evolved at the base of the sister lineage to the Libytheinae, and  
234 *Discal* eyespots followed in ancestors of Heliconiine and Nymphaline. We found that the Bayes Factor  
235 (BF) between our two sampling methods (PS & SS) was largely consistent between runs for the same  
236 taxa (Table 1). When the circular criteria for eyespot shape was relaxed (Fig. S18), we found some  
237 evidence for a more ancestral origin of *Discal* eyespots in the Saturniidae. The BF for this more  
238 relaxed model is available in the supplementary information (Fig. S18).

| Table 1. Log 10 of the raw Bayes factor for each of our eyespot radiations identified in our tree. Values for both PS and SS sampling methods are provided. |                  |                  |                    |                    |                |                |
|-------------------------------------------------------------------------------------------------------------------------------------------------------------|------------------|------------------|--------------------|--------------------|----------------|----------------|
| Taxa (Family)                                                                                                                                               | <i>Discal</i> PS | <i>Discal</i> SS | <i>Marginal</i> PS | <i>Marginal</i> SS | <i>Both</i> PS | <i>Both</i> SS |
| Saturniidae                                                                                                                                                 | 0.146            | 0.145            | 0.110              | 0.104              | 0.247          | 0.253          |
| Nymphalidae                                                                                                                                                 | 0.127            | 0.126            | 0.131              | 0.126              | 0.150          | 0.132          |

239 To investigate the 27 other *Discal* and 18 other *Marginal* eyespot occurrences which were not part of  
240 any eyespot radiation (Fig. 5), we investigated the occurrence of eyespots in up to 3 closely related  
241 species. These closely related species did not feature on our tree and were limited from the genus to  
242 the family level (Fig. S19). We found that many clades with eyespots that were represented by a

243 single species on our tree (Fig. 5) had several closely related species also bearing eyespots (Fig. S19).  
244 This suggests that these multiple clades represent separate, independent eyespot radiations (Fig. 5 &  
245 Fig. S19).

## 246 Discussion

247 Our results show that eyespot evolution in Lepidoptera is diverse and complex. The majority of  
248 eyespot research, up to now, has been conducted in a single clade (Nymphalidae), but here we  
249 demonstrate that eyespots have evolved multiple times independently across the Lepidoptera,  
250 including in many poorly known moth clades (Fig. 4 & Fig. 5). In our phylogeny, these clades are often  
251 represented by a single species. However, we documented eyespots in close relatives to each of  
252 these lineages (Fig. S19), suggesting eyespots have been preserved across additional radiations.  
253 Future phylogenetic studies, with a denser taxonomic sampling, will be required to characterize the  
254 evolutionary history of eyespots in these lesser-known clades. Nonetheless, our study strongly  
255 suggests that eyespots are not homologous across the entire Lepidoptera.

256 The evolution of Marginal eyespots in the Nymphalidae has been studied before and we report  
257 similar findings to these previous studies. Our findings align more closely with the ‘early’ model of  
258 eyespot evolution first proposed by Oliver et al. (2012 & 2014), as opposed to the ‘late’ model that  
259 became the preferred model (Oliver et al. 2014). In Both our analysis, and in the ‘early’ model,  
260 eyespots were coded as being present or absent anywhere on the wing, whereas the ‘late’ model  
261 preferred by Oliver et al., (2014) had increased resolution by scoring the presence of eyespots in  
262 specific wing sectors. This late model brought the origin of eyespots to a node above the one  
263 discovered here, to the base of the lineage that is sister to the Danainae. Despite minor conflict as to  
264 when exactly *Marginal* eyespots first evolved, this and previous studies agree on a single and  
265 relatively early origin of Marginal these eyespots in Nymphalidae.

266 Nymphalid *Disca* eyespots and their evolutionary history have not been investigated before. Here  
267 we presented a first estimate of *Disca* eyespot evolution in the nymphalidae, as Oliver et al., (2012 &

268 2014) did not study these *Discal* eyespots. *Discal* nymphalid eyespots appear to have evolved in two  
269 separate clades and are not homologous across all species in the family Nymphalidae. Firstly, in the  
270 closely related Nymphalidae subclades Heliconiine (Limenitidinae- *Limenitis arthemis*) and  
271 Nymphaline (Apaturinae-*Asterocampa celtis*, Biblidinae-*Hamadryas arinome*, Melitaeini-*Phyciodes*  
272 *phaon* & Nymphalini-*Vanessa carye*), we find that the *Discal* eyespot evolved once and then radiated  
273 across several groups, making discal eyespots homologous across the Heliconiine and Nymphalini (Fig.  
274 5 & Fig S10). The second instance of discal eyespot evolution which is not homologous to the other  
275 Nymphalidae is *Neope goschkevitschii* (Satryinae, Nymphalidae. Figs. 2 & 5 & Figs. S10 & S19). *Neope*  
276 *sp.* and closely related species within the Satryinae were found to have *Discal* eyespot patterns (Fig.  
277 S19), upon our investigation of closely related species not featured on the tree and may represent a  
278 unique *Discal* eyespot radiation within the Satryinae (Fig. S19).

279 We provided the first examination of the evolution of eyespots (*Discal* and *Marginal*) in the  
280 Saturniidae and demonstrate that *Discal* eyespots in the Saturniidae are homologous while *Marginal*  
281 eyespots are not. We found that *Discal* eyespots likely originated in the most recent common  
282 ancestor of all Saturniids, with *Discal* eyespots being present in 62% of the represented clades within  
283 the family. Making discal eyespots homologous across the family Saturniidae. *Marginal* eyespots, on  
284 the other hand, have evolved and radiated within the Attacini tribe of the subfamily Saturniinae. The  
285 *Marginal* eyespot radiation observed within the Attacini includes species of the genus *Samia*,  
286 *Callosamia*, *Epiphora* & *Hyalophora*. We also observed independent origins of *Marginal* eyespots  
287 within the Saturniidae in three additional taxonomic groups, meaning that marginal eyespots in the  
288 Saturniidae are not homologous. Two of the three representatives of these groups in our phylogeny  
289 (*Copaxa multifenestrata*-tribe Saturniinae & subfamily Saturniinae and *Asthenidia transversaria*-  
290 subfamily Oxyteninae) were found to have close relatives with *Marginal* eyespots suggesting  
291 individual eyespot radiations within these taxa (Fig. 5 & Figs. S15A, S15C & S19). One species,  
292 *Eupackardia calleta* (tribe Attacini, subfamily Saturniinae) is monotypic at the genus level and its  
293 closest relatives are other Saturniidae of the tribe Attacini. Despite being in the Attacini, this species



294 is not picked up in our analysis as being part of the *Marginal* eyespot radiation associated with the  
295 other Attacini in our study SS Log<sub>10</sub> of BF = -0.123, PS Log<sub>10</sub> of BF = -0.130) (Fig. 5, Fig. S15A &  
296 S15C). We therefore conclude that the marginal eyespot in this species likely evolved independently  
297 to its congeners in the Attacini.

298 Our analyses revealed that eyespots appeared after each other (and in a different order in butterflies  
299 and silk-moths). *Marginal* eyespots in Nymphalidae are considered serially homologous (Monteiro et  
300 al., 2007 & Hombría 2011) but they appeared in a particular sequence on the wings. They first  
301 originated in ventral hindwings, and millions of years later they appeared in forewings and dorsal  
302 surfaces (Oliver 2014; Schachat et al 2015). *Discal* eyespots may be yet another instance of a serial  
303 homolog, with a more distinct and central location on the wing. By statistically demonstrating that  
304 eyespots, as a complex derived trait, can evolve in different locations on the wing in a different  
305 sequence, we open the door to more in-depth developmental level studies that investigate how each  
306 type of eyespot differentiates on the wing.

307 Although we demonstrate that nymphalid and saturniid eyespots evolved in lineages which are  
308 currently understood to be ~110 million years apart (Kawahara et al., 2019) and are not  
309 evolutionarily homologous, it is still possible that eyespots in these two superfamilies share the same  
310 gene regulatory network (GRN). Previous research by Murugesan et al. (2022) found that an  
311 appendage gene regulatory network was co-opted to build *Marginal* eyespots in *Bicyclus anynana*, a  
312 nymphalid butterfly. We suggest that the co-option of the same GRN could have happened more  
313 than once across the Lepidoptera. To test this, it will be important to characterize the *Marginal* and  
314 *Discal* eyespot GRN in moth lineages and/or the *Discal* eyespot GRN in butterfly lineages, at the level  
315 of gene expression. Early immunochemistry work in two saturniid species detected the presence of  
316 two (nymphalid) eyespot marker proteins, Distal-less and Engrailed, in the moth *Discal* eyespots  
317 (Monteiro et al. 2006). Stronger evidence for the use of the same appendage GRN in these *Discal*  
318 moth eyespots may need to come from CRISPR knockouts of cis-regulatory elements belonging to

319 common eyespot and appendage genes, showing that Both appendages and eyespots are affected  
320 (Murugesan et al. 2022).

321 Finally, while the focus of this work is on eyespot evolution, this phylogeny also provides evidence  
322 supporting Both new and already established relationships among Lepidopteran lineages, including  
323 at the superfamily level (Appendix 1). These insights can fuel future systematic research and further  
324 comparative work on how wing color patterns, and other adaptive traits, evolve in the Lepidoptera.

325 **Acknowledgements:** We thank Dr Mark Willmott and Prof Akito Kawahara (MGCL) for hosting B.H. at  
326 the MGCL and facilitating access to the collections; Prof emeritus Charles Mitter (University of  
327 Maryland) for graciously sending us molecular sequence data for most specimens reanalyzed here;  
328 Monteiro lab members for lively discussion, and Mr David Teo Yan Hua for expertise in PC  
329 engineering and technological assistance. B.H was supported by a National Research Foundation  
330 (NRF) Graduate Fellowship; B.W. was funded by an International Postdoc Grant from the Swedish  
331 Research Council (VR; grant no. 2019-06444); and research was supported by a NRF Investigatorship  
332 award (NRF-NRFI05-2019-0006) to A.M.

333 **Conflict of interest:** The authors declare no conflict of interests.

334 **References:**

335 Aarvik & Karisch in Aarvik L, Karisch T, plazi (2009). Revision of Multiquaestia, Karisch (Lepidoptera:  
336 Tortricidae: Grapholitini). Plazi.org taxonomic treatments database. Checklist dataset  
337 <https://doi.org/10.5281/zenodo.274748> accessed via GBIF.org on 2023-02-22.

338 Arias, M., Mappes, J., Desbois, C., Gordon, S., McClure, M., Elias, M., . . . Gomez, D. (2019).  
339 Transparency reduces predator detection in mimetic clearwing butterflies. *Functional Ecology*, 33(6),  
340 1110-1119.

341 Auguie B (2017). `_gridExtra: Miscellaneous Functions for "Grid" Graphics_`. R package version 2.3,  
342 <<https://CRAN.R-project.org/package=gridExtra>>.

343 Banerjee, T. D., Murugesan, S. N., Connahs, H., & Monteiro, A. (2023). Spatial and temporal  
344 regulation of Wnt signaling pathway members in the development of butterfly wing patterns. *Science*  
345 *Advances*, 9(30), eadg3877.

346 Bazinet, A. L., Cummings, M. P., Mitter, K. T., & Mitter, C. W. (2013). Can RNA-Seq resolve the rapid  
347 radiation of advanced moths and butterflies (Hexapoda: Lepidoptera: Apoditrysia)? An exploratory  
348 study. *PloS one*, 8(12), e82615.

349 Bhardwaj, S., Jolander, L. S.-H., Wenk, M. R., Oliver, J. C., Nijhout, H. F., & Monteiro, A. (2020). Origin  
350 of the mechanism of phenotypic plasticity in satyrid butterfly eyespots. *Elife*, 9, e49544.

351 Blest, A. D. (1957). The function of eyespot patterns in the Lepidoptera. *Behaviour*, 209-256.

352 Brakefield, P. M. (2003). The power of evo-devo to explore evolutionary constraints: experiments  
353 with butterfly eyespots. *Zoology*, 106(4), 283-290.

- 354 Breuker, C. J., & Brakefield, P. M. (2002). Female choice depends on size but not symmetry of dorsal  
355 eyespots in the butterfly *Bicyclus anynana*. *Proceedings of the Royal Society of London. Series B:*  
356 *Biological Sciences*, 269(1497), 1233-1239.
- 357 Carter, D. J., & Hargreaves, B. (1986). *A field guide to caterpillars of butterflies and moths in Britain*  
358 *and Europe*: Collins.
- 359 Connahs, H., Rhen, T., & Simmons, R. B. (2016). Physiological perturbation reveals modularity of  
360 eyespot development in the painted lady butterfly, *Vanessa cardui*. *PloS one*, 11(8), e0161745.
- 361 D'Abbrera, B. (1995). *Saturniidae Mundi, Saturniid moths of the world part I*. Keltern, Germany:  
362 Automeris press in association with Victoria Australia Melbourne & London: Hill house.
- 363 D'Abbrera, B. (2012). *Saturniidae Mundi, Saturniid moths of the world part II*. Victoria Australia,  
364 Melbourne & London: Hill house.
- 365 D'Abbrera, B. (1998). *Saturniidae Mundi, Saturniid moths of the world part III*. Keltern, Germany:  
366 Goecke & Evers in association with Victoria Australia Melbourne & London: Hill house.
- 367 De Prins, J., & Kawahara, A. Y. (2012). Systematics, revisionary taxonomy, and biodiversity of  
368 Afrotropical Lithocolletinae (Lepidoptera: Gracillariidae). *Zootaxa*, 3594(1), 1–283-281–283.
- 369 De Prins W. & Steeman C. 2003–2023. \*Catalogue of the Lepidoptera of Belgium\*. Last accessed on  
370 the 22/02/2023. Available online at <https://projects.biodiversity.be/lepidoptera>
- 371 Epstein, M. E. (1996). Revision and phylogeny of the limacodid-group families, with evolutionary  
372 studies on slug caterpillars (Lepidoptera: Zygaenoidea).
- 373 Fabreti, L. Hoehna, S & Magee, A. (2023). `_convenience`: Convergence assessment for phylogenetic  
374 inference. R package version 1.0.0.
- 375 Fan, Y., Wu, R., Chen, M.-H., Kuo, L., & Lewis, P. O. (2011). Choosing among partition models in  
376 Bayesian phylogenetics. *Molecular biology and evolution*, 28(1), 523-532.
- 377 Halali, D., Krishna, A., Kodandaramaiah, U., & Molleman, F. (2019). Lizards as predators of butterflies:  
378 shape of wing damage and effects of eyespots. *The Journal of the Lepidopterists' Society*, 73(2), 78-  
379 86.
- 380 Heikkilä, M., Kaila, L., Mutanen, M., Peña, C., & Wahlberg, N. (2012). Cretaceous origin and repeated  
381 tertiary diversification of the redefined butterflies. *Proceedings of the Royal Society B: Biological*  
382 *Sciences*, 279(1731), 1093-1099.
- 383 Heikkilä, M., Mutanen, M., Kekkonen, M., & Kaila, L. (2014). Morphology reinforces proposed  
384 molecular phylogenetic affinities: a revised classification for Gelechioidea (Lepidoptera). *Cladistics*,  
385 30(6), 563-589.
- 386 Heikkilä, M., Mutanen, M., Wahlberg, N., Sihvonen, P., & Kaila, L. (2015). Elusive ditrysian phylogeny:  
387 an account of combining systematized morphology with molecular data (Lepidoptera). *BMC*  
388 *Evolutionary Biology*, 15(1), 1-27.
- 389 Hoang, D, T. Chernomor, O. Von Haeseler, A. Minh, B, Q & Vinh, L, S. (2018). UFBoot2: Improving the  
390 ultrafast bootstrap approximation. *Mol. Biol. Evol.*, 35:518–522.
- 391 Hogue, C. L. (1987). Cultural entomology. *Annual Review of Entomology*, 32(1), 181-199.
- 392 Höhna, Landis, Heath, Boussau, Lartillot, Moore, Huelsenbeck, Ronquist. (2016). RevBayes: Bayesian  
393 phylogenetic inference using graphical models and an interactive model-specification language.  
394 *Systematic Biology*, 65:726-736.

- 395 Hombria, J. C.-G. (2011). Butterfly eyespot serial homology: enter the Hox genes. *BMC biology*, 9(1),  
396 1-3.
- 397 Hsu Y-F, Powell JA (2005) Phylogenetic relationships within Heliodinidae and systematics of moths  
398 formerly assigned to Heliodines Stainton (Lepidoptera: Yponomeutoidea). University California  
399 Publications Entomology 124: 1–158.
- 400 Huq, M., Bhardwaj, S., & Monteiro, A. (2019). Male *Bicyclus anynana* butterflies choose females on  
401 the basis of their ventral UV-reflective eyespot centers. *Journal of insect science*, 19(1), 25.
- 402 Jeffreys, H. (1998). *The theory of probability*: OuP Oxford.
- 403 Kalyaanamoorthy, S. Minh, B. Q. Wong, T. K. F. Von Haeseler, A. & Jermin, L. S. (2017). ModelFinder:  
404 Fast Model Selection for Accurate Phylogenetic Estimates, *Nature Methods*, 14:587–589.
- 405 Katoh, K. & Standley, D. M. (2013). MAFFT Multiple Sequence Alignment Software Version 7:  
406 Improvements in Performance and Usability. *Molecular Biology and Evolution*, 30(4), 772–780.
- 407 Kawahara, A., Ohshima, I., Kawakita, A., Regier, J., Mitter, C., Cummings, M., . . . Lopez-Vaamonde, C.  
408 (2011). Increased gene sampling provides stronger support for higher-level groups within gracillariid  
409 leaf mining moths and relatives (Lepidoptera: Gracillariidae). *BMC Evol. Biol*, 11, 182.
- 410 Kawahara, A. Y., & Rubinoff, D. (2012). Three new species of Fancy Case caterpillars from threatened  
411 forests of Hawaii (Lepidoptera, Cosmopterigidae, Hyposmocoma). *ZooKeys*(170), 1.
- 412 Kawahara, A. Y., & Breinholt, J. W. (2014). Phylogenomics provides strong evidence for relationships  
413 of butterflies and moths. *Proceedings of the Royal Society B: Biological Sciences*, 281(1788),  
414 20140970.
- 415 Kawahara, A. Y., Plotkin, D., Espeland, M., Meusemann, K., Toussaint, E. F., Donath, A., . . . Dos Reis,  
416 M. (2019). Phylogenomics reveals the evolutionary timing and pattern of butterflies and moths.  
417 *Proceedings of the National Academy of Sciences*, 116(45), 22657-22663.
- 418 Kawahara, A. Y., Plotkin, D., Ohshima, I., LOPEZ-VAAMONDE, C., Houlihan, P. R., Breinholt, J. W., . . .  
419 Davis, D. R. (2017). A molecular phylogeny and revised higher-level classification for the leaf-mining  
420 moth family Gracillariidae and its implications for larval host-use evolution. *Systematic Entomology*,  
421 42(1), 60-81.
- 422 Kawahara, A. Y., Storer, C., Carvalho, A. P. S., Plotkin, D. M., Condamine, F. L., Braga, M. P., . . .  
423 Lohman, D. J. (2023). A global phylogeny of butterflies reveals their evolutionary history, ancestral  
424 hosts and biogeographic origins. *Nature Ecology & Evolution*. doi:10.1038/s41559-023-02041-9
- 425 Kettlewell, H. (1973). *The Evolution of Melanism: The Study of Recurring Necessity; with Special*  
426 *Reference to Industrial Melanism in the Lepidoptera*. Clarendon Press, Oxford.
- 427 Kristensen, N. P., & Schmidt-Rhaesa, A. (1998). Volume 1: *Evolution, Systematics, and Biogeography*  
428 (Vol. 1): Walter de Gruyter.
- 429 Kodandaramaiah, U. (2011). The evolutionary significance of butterfly eyespots. *Behavioral Ecology*,  
430 22(6), 1264-1271.
- 431 Kodandaramaiah, U., Lindenfors, P., & Tullberg, B. S. (2013). Deflective and intimidating eyespots: a  
432 comparative study of eyespot size and position in Junonia butterflies. *Ecology and evolution*, 3(13),  
433 4518-4524.
- 434 Labandeira, C. C., Yang, Q., Santiago-Blay, J. A., Hotton, C. L., Monteiro, A., Wang, Y.-J., . . . Rose, T. R.  
435 (2016). The evolutionary convergence of mid-Mesozoic lacewings and Cenozoic butterflies.  
436 *Proceedings of the Royal Society B: Biological Sciences*, 283(1824), 20152893.

437

438 Lartillot, N., & Philippe, H. (2006). Computing Bayes factors using thermodynamic integration.  
439 *Systematic biology*, 55(2), 195-207. Miller, J. Y. (2008). *Studies in the Castniidae. V. Description of a*  
440 *New Species of Zegara*: Florida Museum of Natural History, University of Florida.

441 Merilaita, S., Vallin, A., Kodandaramaiah, U., Dimitrova, M., Ruuskanen, S., & Laaksonen, T. (2011).  
442 Number of eyespots and their intimidating effect on naive predators in the peacock butterfly.  
443 *Behavioral Ecology*, 22(6), 1326-1331.

444 Mey, W., Wichard, W., Müller, P., & Wang, B. (2017). The blueprint of the Amphiesmenoptera–  
445 Tarachoptera, a new order of insects from Burmese amber (Insecta, Amphiesmenoptera). *Fossil*  
446 *Record*, 20(2), 129-145.

447 Mitter, C., Davis, D. R., & Cummings, M. P. (2017). Phylogeny and evolution of Lepidoptera. *Annual*  
448 *review of entomology*.

449 Monteiro, A., Glaser, G., Stockslager, S., Glansdorp, N., & Ramos, D. (2006). Comparative insights into  
450 questions of Lepidopteran wing pattern homology. *BMC Developmental Biology*, 6(1), 1-13.

451 Monteiro, A., Chen, B., Scott, L. C., Vedder, L., Priejs, H. J., Belicha-Villanueva, A., & Brakefield, P. M.  
452 (2007). The combined effect of two mutations that alter serially homologous color pattern elements  
453 on the fore and hindwings of a butterfly. *BMC genetics*, 8, 1-10.

454 Monteiro, A. (2015). Origin, development, and evolution of butterfly eyespots. *Annual review of*  
455 *entomology*, 60, 253-271.

456 Mukherjee, R., & Kodandaramaiah, U. (2015). What makes eyespots intimidating—the importance of  
457 pairedness. *BMC Evolutionary Biology*, 15(1), 1-10.

458 Murugesan, S. N., Connahs, H., Matsuoka, Y., Das Gupta, M., Tiong, G. J., Huq, M., . . . Werner, T.  
459 (2022). Butterfly eyespots evolved via cooption of an ancestral gene-regulatory network that also  
460 patterns antennae, legs, and wings. *Proceedings of the National Academy of Sciences*, 119(8),  
461 e2108661119.

462 Mutanen, M., Wahlberg, N., & Kaila, L. (2010). Comprehensive gene and taxon coverage elucidates  
463 radiation patterns in moths and butterflies. *Proceedings of the Royal Society B: Biological Sciences*,  
464 277(1695), 2839-2848.

465 Nguyen, L. T. Schmidt, Heiko A. Haeseler, A & Minh, B. Q. (2015). IQ-TREE: A fast and effective  
466 stochastic algorithm for estimating maximum likelihood phylogenies.

467 Oliver, J. C., Tong, X.-L., Gall, L. F., Piel, W. H., & Monteiro, A. (2012). A single origin for nymphalid  
468 butterfly eyespots followed by widespread loss of associated gene expression.

469 Oliver, J. C., Beaulieu, J. M., Gall, L. F., Piel, W. H., & Monteiro, A. (2014). Nymphalid eyespot serial  
470 homologues originate as a few individualized modules. *Proceedings of the Royal Society B: Biological*  
471 *Sciences*, 281(1787), 20133262.

472 Otaki, J. M. (2020). Morphological and spatial diversity of the discal spot on the hindwings of  
473 nymphalid butterflies: Revision of the nymphalid groundplan. *Insects*, 11(10), 654.

474 Paradis, E. & Schliep, K. (2019). ape 5.0: an environment for modern phylogenetics and evolutionary  
475 analyses in R. *Bioinformatics* 35: 526-528.

476 Plummer, M. Best, N. Cowles, K. & Vines, K. (2006). CODA: Convergence Diagnosis and Output  
477 Analysis for MCMC, *R News*, vol 6, 7-11

- 478 R Core Team (2023). R: A language and environment for statistical computing. R Foundation for  
479 Statistical Computing, Vienna, Austria. URL <https://www.R-project.org/>.
- 480 Regier, J. C., Zwick, A., Cummings, M. P., Kawahara, A. Y., Cho, S., Weller, S., . . . Parr, C. (2009). Toward  
481 reconstructing the evolution of advanced moths and butterflies (Lepidoptera: Ditrysia): an initial  
482 molecular study. *BMC Evolutionary Biology*, 9(1), 1-21.
- 483 Regier, J. C., Brown, J. W., Mitter, C., Baixeras, J., Cho, S., Cummings, M. P., & Zwick, A. (2012). A  
484 molecular phylogeny for the leaf-roller moths (Lepidoptera: Tortricidae) and its implications for  
485 classification and life history evolution. *PLoS ONE*, 7(4), e35574. (2012A)
- 486 Regier, J. C., Mitter, C., Mitter, K., Cummings, M. P., Bazinet, A. L., Hallwachs, W., . . . Zwick, A. (2017).  
487 Further progress on the phylogeny of Noctuoidea (Insecta: Lepidoptera) using an expanded gene  
488 sample. *Systematic Entomology*, 42(1), 82-93.
- 489 Regier, J. C., Mitter, C., Solis, M. A., Hayden, J. E., Landry, B., Nuss, M., . . . Cummings, M. P. (2012). A  
490 molecular phylogeny for the pyraloid moths (Lepidoptera: Pyraloidea) and its implications for  
491 higher-level classification. *Systematic Entomology*, 37(4), 635-656. (2012B)
- 492 Regier, J. C., Mitter, C., Zwick, A., Bazinet, A. L., Cummings, M. P., Kawahara, A. Y., . . . Davis, D. R.  
493 (2013). A large-scale, higher-level, molecular phylogenetic study of the insect order Lepidoptera  
494 (moths and butterflies). *PLoS ONE*, 8(3), e58568.
- 495 Regier, J. C., Mitter, C., Davis, D. R., Harrison, T. L., SOHN, J. C., Cummings, M. P., . . . Mitter, K. T.  
496 (2015). A molecular phylogeny and revised classification for the oldest ditrysiian moth lineages (L  
497 epidoptera: T ineoidea), with implications for ancestral feeding habits of the mega-diverse D itrysia.  
498 *Systematic Entomology*, 40(2), 409-432.
- 499 Regier, J. C., Mitter, C., Solis, M. A., Hayden, J. E., Landry, B., Nuss, M., . . . Cummings, M. P. (2012). A  
500 molecular phylogeny for the pyraloid moths (Lepidoptera: Pyraloidea) and its implications for  
501 higher-level classification. *Systematic Entomology*, 37(4), 635-656.
- 502 Revell, L. J. (2012) phytools: An R package for phylogenetic comparative biology (and other things).  
503 *Methods in Ecology and Evolution*, 3, 217-223.
- 504 Schachat, S. R., Oliver, J. C., & Monteiro, A. (2015). Nymphalid eyespots are co-opted to novel wing  
505 locations following a similar pattern in independent lineages. *BMC evolutionary biology*, 15(1), 1-9.
- 506 Sohn, J.-C., Regier, J. C., Mitter, C., Davis, D., Landry, J.-F., Zwick, A., & Cummings, M. P. (2013). A  
507 molecular phylogeny for Yponomeutoidea (Insecta, Lepidoptera, Ditrysia) and its implications for  
508 classification, biogeography and the evolution of host plant use. *PLoS ONE*, 8(1), e55066.
- 509 Sohn, J. C., Regier, J. C., Mitter, C., Adamski, D., LANDRY, J. F., Heikkilä, M., . . . Zwick, A. (2016).  
510 Phylogeny and feeding trait evolution of the mega-diverse Gelechioidea (Lepidoptera: Obtectomera):  
511 new insight from 19 nuclear genes. *Systematic Entomology*, 41(1), 112-132.
- 512 Sohn, J.-C., & Choi, S.-W. (2016). First report of Saridoscelinae (Lepidoptera, Yponomeutidae) in  
513 Korea with new records of *Saridoscelis kodamai* Moriuti from Korea and China. *Korean journal of  
514 applied entomology*, 55(4), 347-350.
- 515 Sondhi, S., Karmakar, T., Sondhi, Y., & Kunte, K. (2021). Moths of Tale Wildlife Sanctuary, Arunachal  
516 Pradesh, India with seventeen additions to the moth fauna of India (Lepidoptera: Heterocera).  
517 *Tropical Lepidoptera Research*, 1-53.
- 518 Stevens, M. (2005). The role of eyespots as anti-predator mechanisms, principally demonstrated in  
519 the Lepidoptera. *Biological Reviews*, 80(4), 573-588.

- 520 Tribble, C. May, M. Freyman, W. Landis, M. Ying, L. Barido-Sottani, J. Magee, A. Kopperud, B & Hohna,  
521 S. (2023). *\_RevGadgets: Visualization and Post-Processing of 'RevBayes' Analyses*
- 522 Van Nieukerken, E., Kaila, L., Kitching, I., Kristensen, N., Lees, D., Minet, J., . . . Simonsen, T. (2011).  
523 Animal Biodiversity: an Outline of Higher-level Classification and Survey of Taxonomic Richness.  
524 Zootaxa (3148). In: Wickham, H. (2016). *ggplot2: Elegant Graphics for Data Analysis*. Springer-Verlag  
525 New York.
- 526 Wickham, H. Hester, J. Chang, W & Bryan J (2022). *\_devtools: Tools to Make Developing R Packages  
527 Easier\_*. R package version 2.4.5, <<https://CRAN.R-project.org/package=devtools>>.
- 528 Wickham, H. Vaughan, D & Girlich M. (2023). *\_tidyr: Tidy Messy Data\_*. R package version 1.3.0,  
529 <<https://CRAN.R-project.org/package=tidyr>>.
- 530 Xie, W., Lewis, P. O., Fan, Y., Kuo, L., & Chen, M.-H. (2011). Improving marginal likelihood estimation  
531 for Bayesian phylogenetic model selection. *Systematic biology*, 60(2), 150-160.
- 532 Xu, S. Lin, L. Luo, X. Chen, M. Tang, W. Zhan, L. Dai, Z. Lam, T. Guan, Y. & Yu, G. (2022). *Ggtree: A  
533 serialized data object for visualization of a phylogenetic tree and annotation data*. *iMeta* 2022,  
534 4(1):e56. doi:10.1002/imt2.56
- 535 Yu, G. (2020). Using *ggtree* to visualize data on tree-like structures. *Current Protocols in  
536 Bioinformatics*, 2020, 69:e96. doi: 10.1002/cpbi.96
- 537 Yu, G. (2022). *Data Integration, Manipulation and Visualization of Phylogenetic Trees* (1st edition).  
538 Chapman and Hall/CRC. doi:10.1201/9781003279242
- 539 Yu, G. Lam, T. Zhu, H. & Guan, Y. (2018). Two methods for mapping and visualizing associated data on  
540 phylogeny using *ggtree*. *Molecular Biology and Evolution* 2018, 35(2):3041-3043. doi:  
541 10.1093/molbev/msy194
- 542 Yu, G. Smith, D. Zhu, H. Guan, & Y. Lam, T. (2017). *ggtree: an R package for visualization and  
543 annotation of phylogenetic trees with their covariates and other associated data*. *Methods in Ecology  
544 and Evolution* 2017, 8(1):28-36. doi:10.1111/2041-210X.12628
- 545 Zahiri, R., Kitching, I. J., Lafontaine, J. D., Mutanen, M., Kaila, L., Holloway, J. D., & Wahlberg, N.  
546 (2011). A new molecular phylogeny offers hope for a stable family level classification of the  
547 Noctuoidea (Lepidoptera). *Zoologica Scripta*, 40(2), 158-173.
- 548 Zhang, L., & Reed, R. D. (2016). Genome editing in butterflies reveals that spalt promotes and Distal-  
549 less represses eyespot colour patterns. *Nature communications*, 7(1), 11769.
- 550 **Websites:**
- 551 **Afro-Moths:**
- 552 De Prins J. & De Prins W. 2011–2021. Afromoths, online database of Afrotropical moth species  
553 (Lepidoptera). World Wide Web electronic publication (<http://www.afromoths.net>) [last accessed on  
554 the 8/10/2022].
- 555 **Bold V3 & V4:**
- 556 Ratnasingham, S. & Hebert, P. D. N. (2007). BOLD: The Barcode of Life Data System  
557 ([www.barcodinglife.org](http://www.barcodinglife.org)). *Molecular Ecology Notes* 7, 355-364. DOI: 10.1111/j.1471-  
558 8286.2006.01678.x
- 559 Ratnasingham S, Hebert P.D.N (2013). A DNA-Based Registry for All Animal Species: The Barcode  
560 Index Number (BIN) System. *PLoS ONE* 8(8): e66213. DOI:10.1371/journal.pone.0066213

- 561 Butterflies of America:
- 562 Warren, A. D., K. J. Davis, E. M. Stangeland, J. P. Pelham, K. R. Willmott & N. V. Grishin. (2023).  
563 Illustrated Lists of American Butterflies. Website version: [14-II-2023] last accessed on the 22/02/  
564 2023. Available at: <http://www.butterfliesofamerica.com>
- 565 Cornell university insect collection:
- 566 Cornell University insect collection (2023). A database of insect images and collections made  
567 available online by Cornell university. Last accessed on the 22/02/2023 and available at:  
568 <https://cuic.entomology.cornell.edu/>
- 569 CSIRO:
- 570 Australian moths online (CSIRO project, 2022). Online database of the Australian national museum,  
571 last accessed on the 16/11/2022 at: [Australian Moths Online \(csiro.au\)](http://www.australianmoths.com.au)
- 572 GBIF:
- 573 GBIF: The Global Biodiversity Information Facility (2022) What is GBIF? Available from  
574 <https://www.gbif.org/what-is-gbif>
- 575 Gracillariidae database:
- 576 De Prins J. & De Prins W. 2006–2022. Global Taxonomic Database of Gracillariidae (Lepidoptera).  
577 World Wide Web electronic publication (<http://www.gracillariidae.net>) [last accessed on the  
578 22/02/2023].
- 579 Insecta Pro:
- 580 Insecta Pro (2022). A website which has a data base of many different species of Lepidoptera and  
581 other insects. Last accessed on the 18/08/2022 at: <http://insecta.pro/>
- 582 ITOL
- 583 iTOL(2023). Interactive Tree Of Life. Available at: <https://itol.embl.de> (Accessed: 6th January 2024)
- 584 Japanese moths:
- 585 Japanese moths.org (2023). A large website containing many Japanese moth species. Last accessed  
586 on the 22/02/2023. Available at: <http://www.jpmoth.org>
- 587 Lepi forum:
- 588 Lepi forum, a German Lepidopteran data base of online photos and other useful information about  
589 Lepidoptera. Last accessed on the 19/07/2022 and available at: <https://lepiforum.org/>
- 590 Moths Photographers group:
- 591 The website for the North American Moth photographers group based at the Mississippi  
592 entomological museum, part of Mississippi state university. Website was last accessed on the  
593 16/08/2022 and is available at: [Moth Photographers Group -- Main Menu \(msstate.edu\)](http://www.mothphotographersgroup.com)
- 594 Moths of India:
- 595 Moths of India. (2023). An online database which holds the collection of many moths found in India.  
596 Last accessed on the 22/02/2023 and available at: [Welcome to the Moths of India website! | Moths](http://www.mothsofindia.com)
- 597 Scan Bugs:



- 598 SCAN bugs. (2022). A image archive of insects from various institutions. Available at: [http://scan-](http://scan-bugs.org/portal/index.php)  
599 [bugs.org/portal/index.php](http://scan-bugs.org/portal/index.php). Last accessed on 02/08/2022.
- 600 Swedish museum of natural history:
- 601 Swedish museum of natural history. (2023). Available at [Index of /en \(nrm.se\)](#) Last accessed on  
602 23/02/2023.
- 603 The museum of Shimane database:
- 604 The museum of Shimane database (2022). Database of Japanese Lepidoptera accessed on the  
605 16/08/2022, last accessed at: [http://museum-database.shimane-](http://museum-database.shimane-u.ac.jp/specimen/detail/502420180331122106)  
606 [u.ac.jp/specimen/detail/502420180331122106](http://museum-database.shimane-u.ac.jp/specimen/detail/502420180331122106)
- 607 The Smithsonian Tropical Research Institute:
- 608 The Smithsonian Tropical Research Institute database. Last accessed on the 19/08/2022. Available at:  
609 [Smithsonian Tropical Research Institute | \(si.edu\)](#)
- 610 Taiwan encyclopedia of life:
- 611 Taiwan encyclopedia of life (2023). An online database of Taiwanese flora and fauna. Last accessed  
612 on the 22/02/2022 and available at: <https://taieol.tw/>
- 613 **Places/Physical collections:**
- 614 The Maguire Center for Lepidoptera (MGCL, 2022). Collections accessed in person 14.05.2022 to  
615 04.06.2022. Hosted by Dr Keith Willmott (Director and curator) and Professor Akito Kawahara  
616 (Principal investigator and curator).
